# Supplementary material for: Immunological and Genomic Analysis Reveals Clinically Relevant Distinctions between Angiosarcoma Subgroups
Source: MDPI journal article supplement (doi:10.3390/cancers14235938), 2022-11-30
Supplement: s1 [file s1]

Figure S1: Overview mutational signatures High-TMB

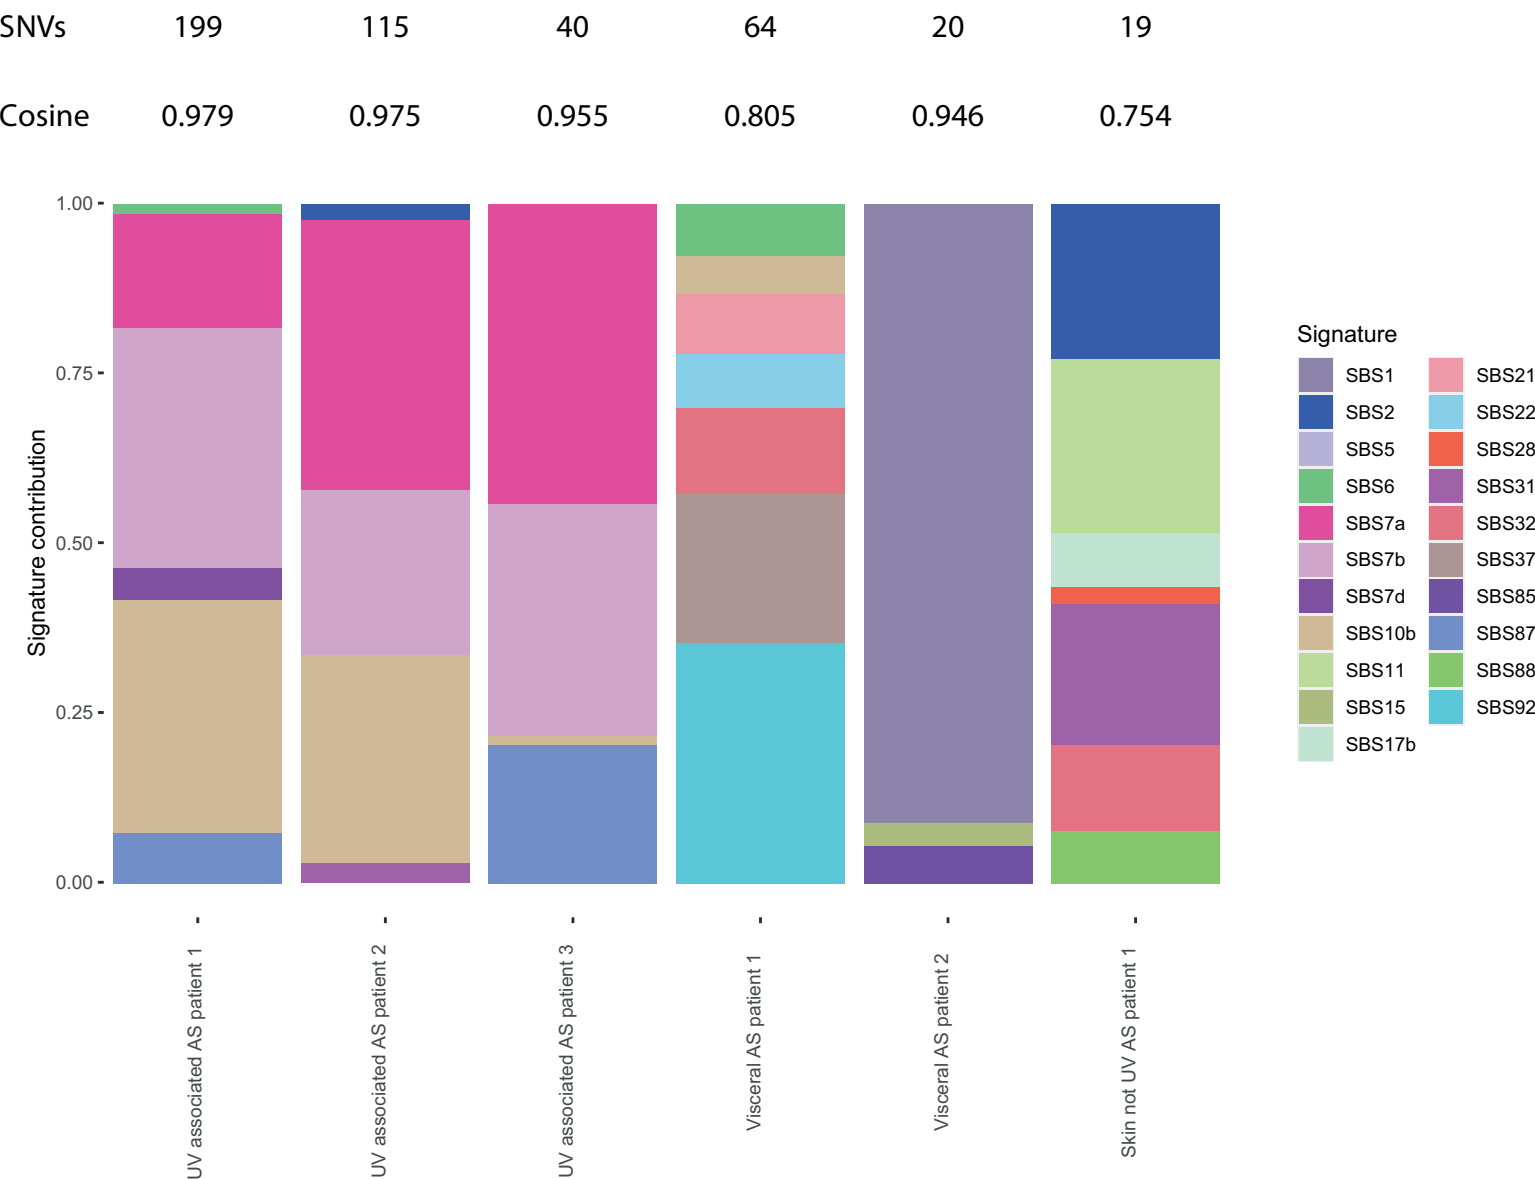

Figure S1: Mutational signatures in patients classified as high TMB ( $\geq 10$  mut/Mb). Signature recognition was measured using cosine similarity. SNV; Single Nucleotide Variation.

Figure S2: Overview of all (likely) pathogenic alterations

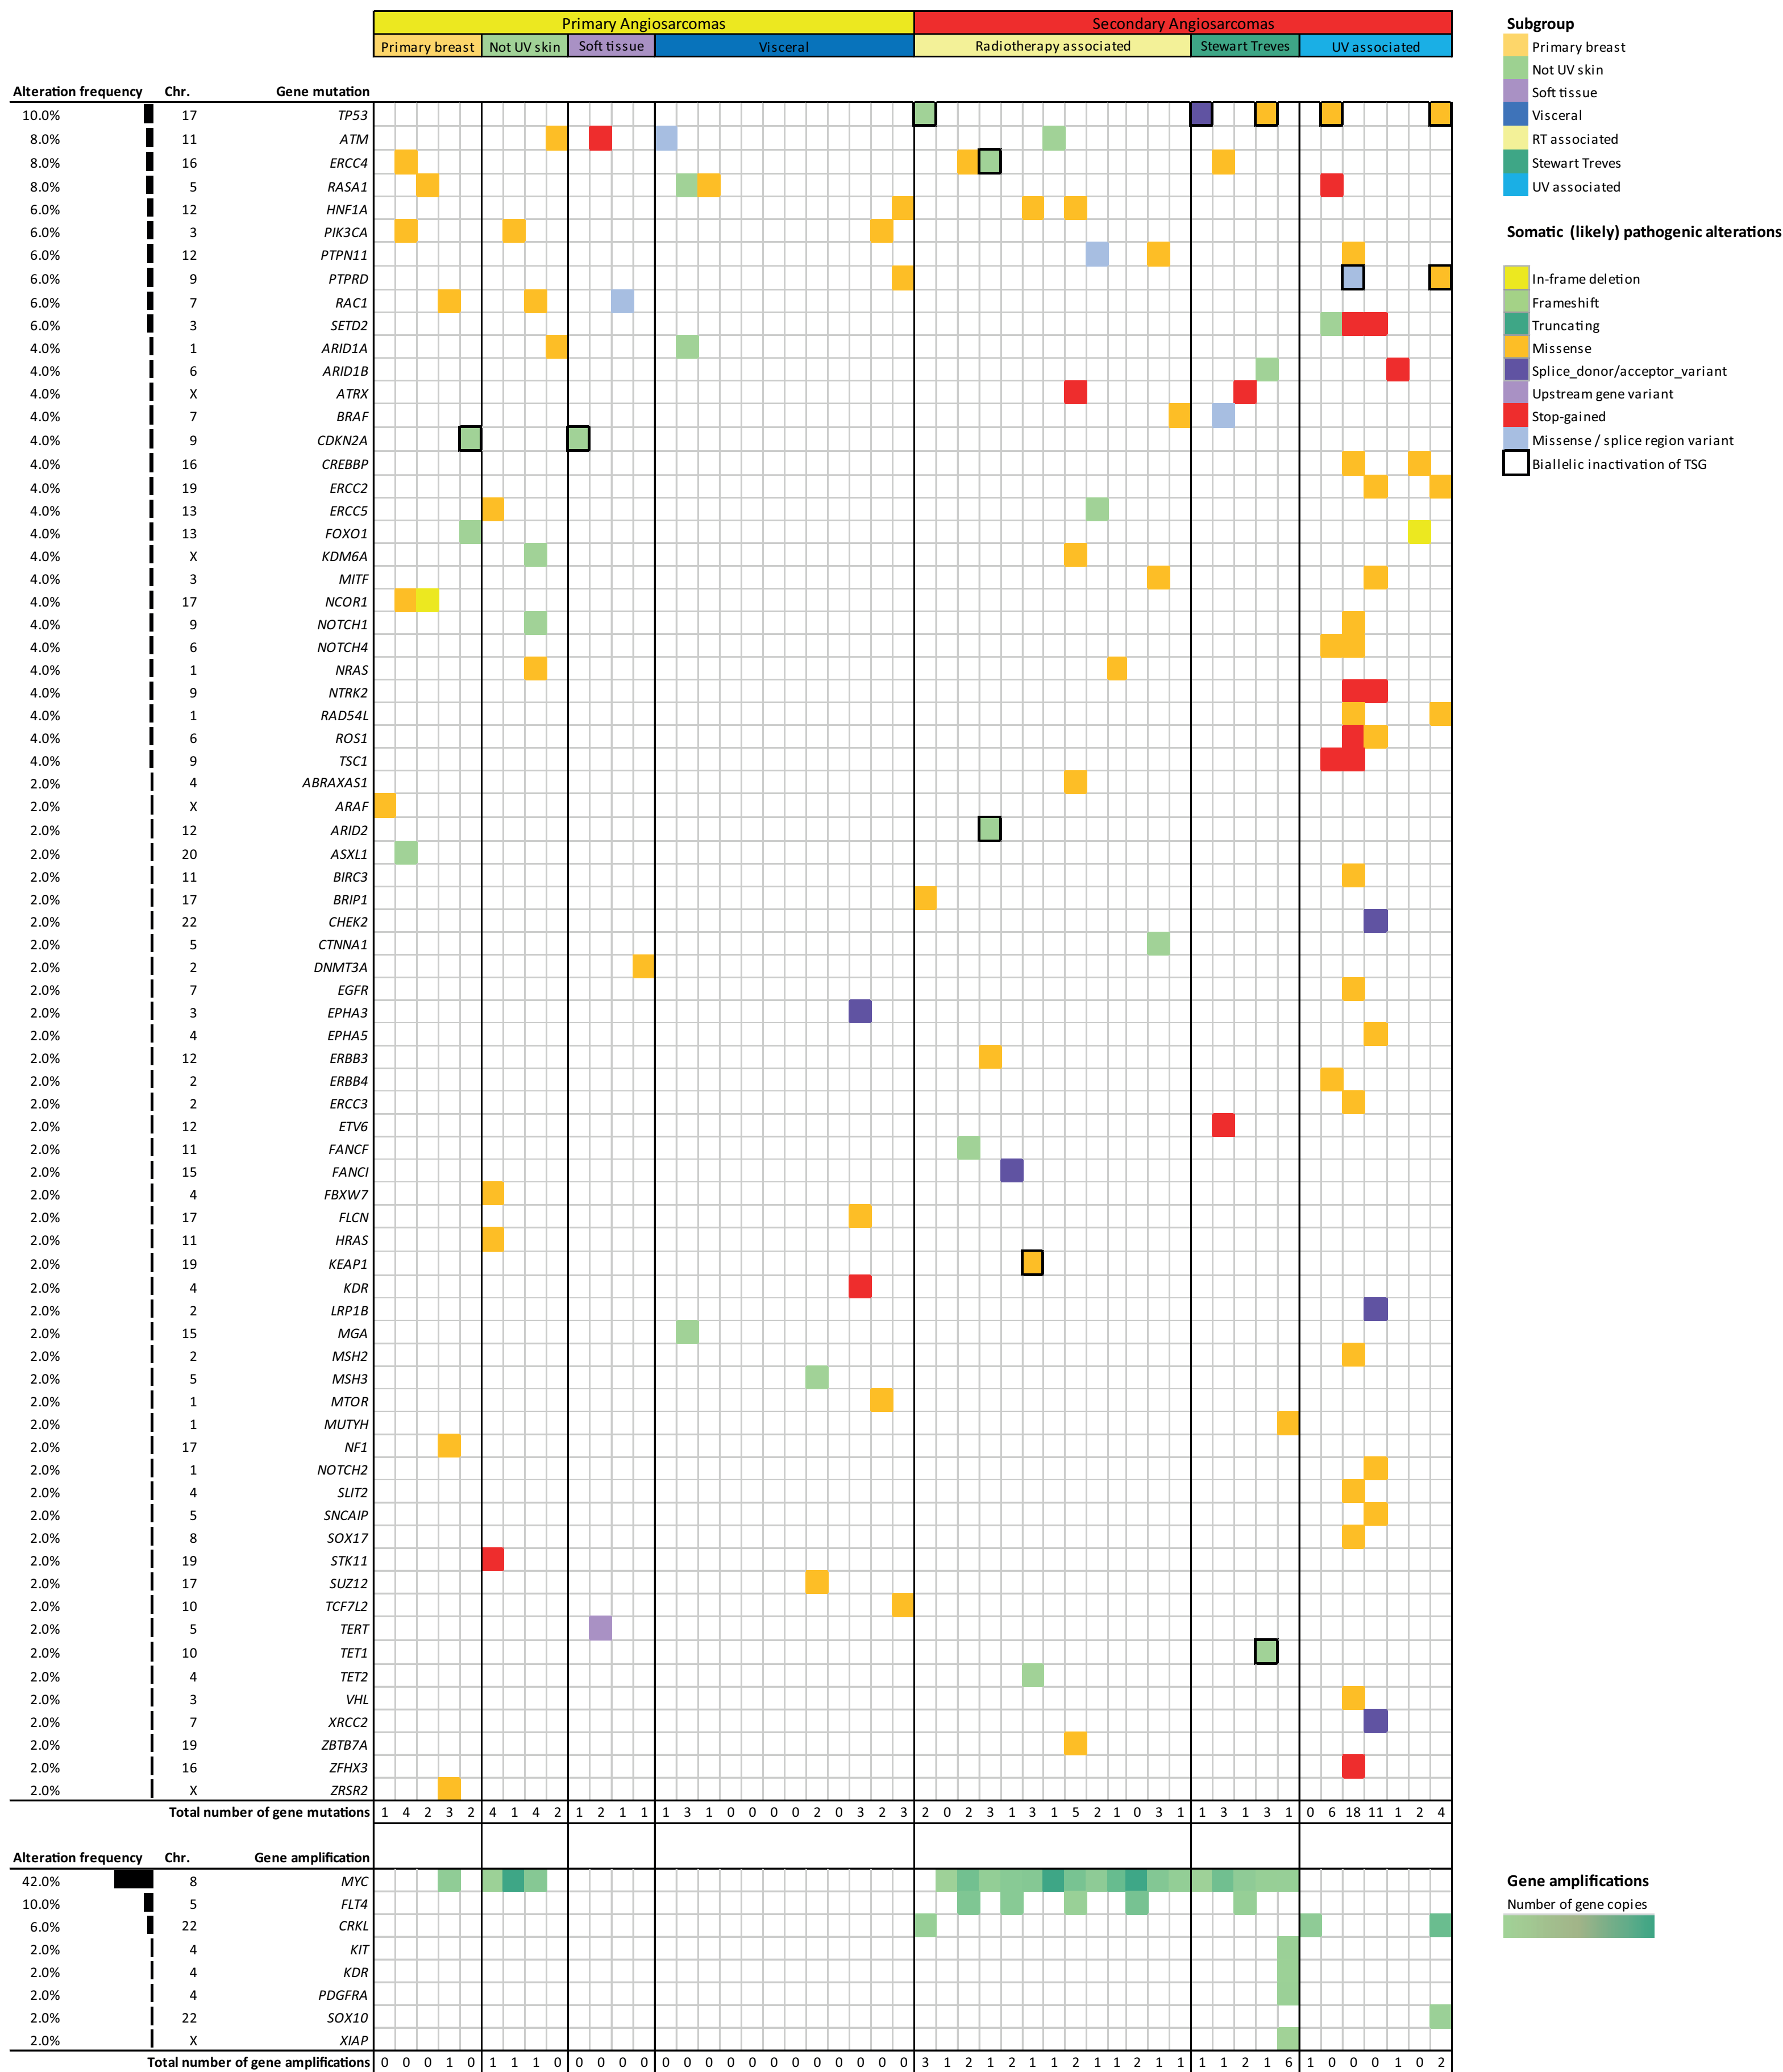

Figure S3: Overview of all class 3 mutations (variants of unknown significance)

Table S1: Immune cell densities for AS subgroups. Cell densities are reflected in cells/mm<sup>2</sup> with the IQR for all individual immune cell subclasses. This table reflects the combined data of the visceral and hearts AS subgroup taken together in one subgroup (visceral).

| Angiosarcoma Subgroup              | Primary AS (n=79)   |                |                     |                  | Secondary AS (n=178)   |                       |                        |
|------------------------------------|---------------------|----------------|---------------------|------------------|------------------------|-----------------------|------------------------|
|                                    | Soft tissue<br>n=11 | Breast<br>n=20 | Skin not UV<br>n=15 | Visceral<br>n=33 | RT associated<br>n=126 | UV associated<br>n=38 | Stewart Treves<br>n=14 |
| Median cells/mm <sup>2</sup> (IQR) |                     |                |                     |                  |                        |                       |                        |
| CD3+ T-cells                       | 245 (549)           | 234 (246)      | 232 (280)           | 336 (450)        | 355 (605)              | 817 (862)             | 588 (734)              |
| CD8+ T-cells                       | 99 (406)            | 78 (94)        | 74 (60)             | 109 (203)        | 101 (186)              | 184 (230)             | 87 (209)               |
| FoxP3+ T-cells                     | 28 (63)             | 14 (35)        | 32 (50)             | 12 (25)          | 32 (60)                | 92 (161)              | 23 (35)                |
| CD4+ T-cells                       | 94 (137)            | 127 (118)      | 145 (143)           | 129(237)         | 190 (355)              | 461 (460)             | 457 (608)              |
| CD20+ B-cells                      | 26 (82)             | 22 (38)        | 15 (11)             | 38 (122)         | 21 (98)                | 44 (145)              | 88 (130)               |
